# Supplementary material for: Integration of Radiometric Ground-Based Data and High-Resolution QuickBird Imagery with Multivariate Modeling to Estimate Maize Traits in the Nile Delta of Egypt
Source: MDPI journal article supplement (doi:10.3390/s21113915), 2021-06-06
Supplement: s1 [file s1]

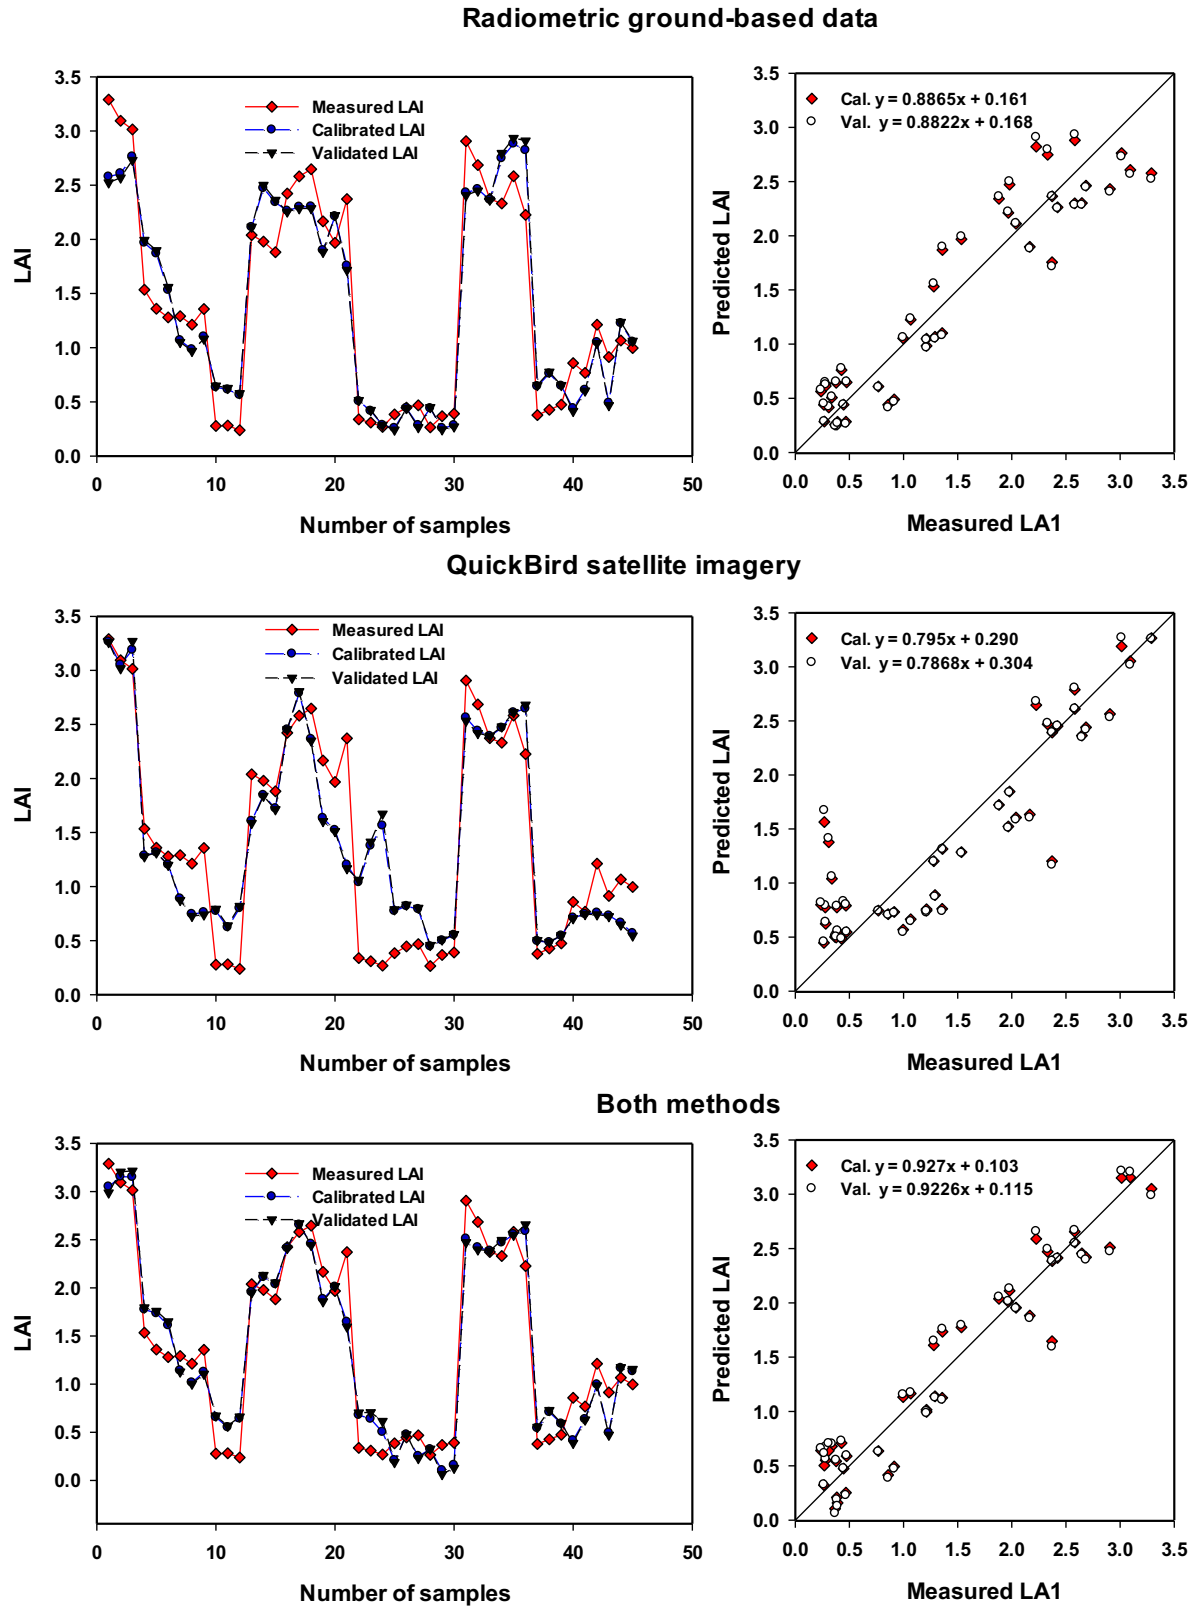

**Figure S1.** Comparison between measuring series, calibrating series and validating series for leaf area index (LAI) of maize using the MLR models based on selected vegetation-SRIs extracted from (a) radiometric ground-based data, (b) extracted from QuickBird satellite imagery and (c) extracted from both methods.

(a) Radiometric ground-based data

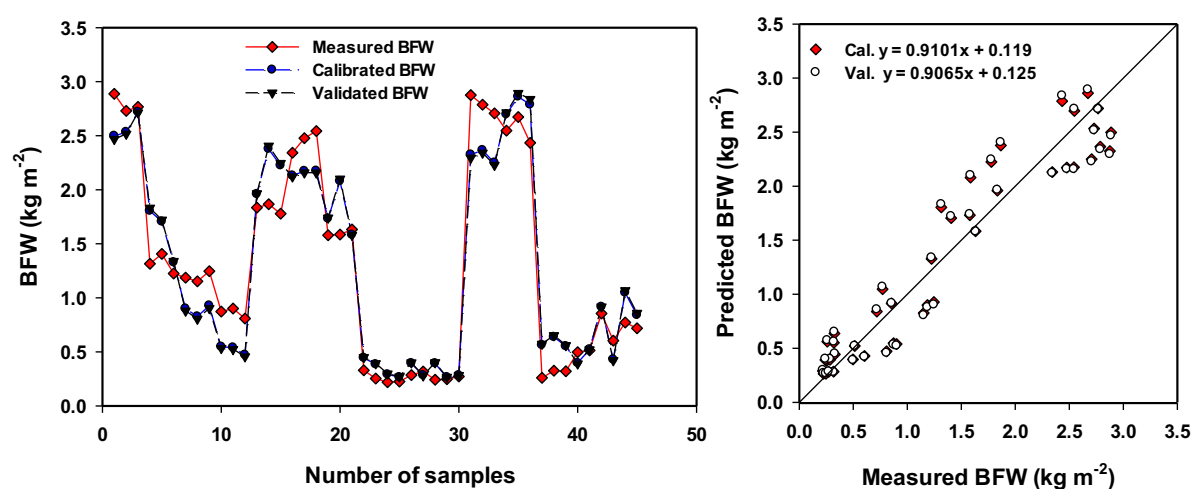

(b) QuickBird satellite imagery

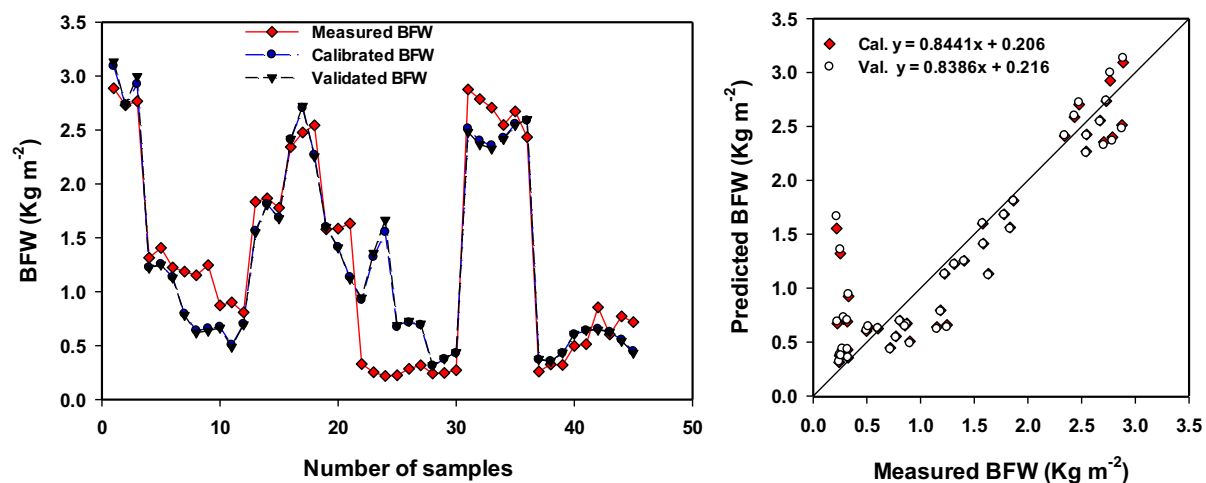

(c) Both methods

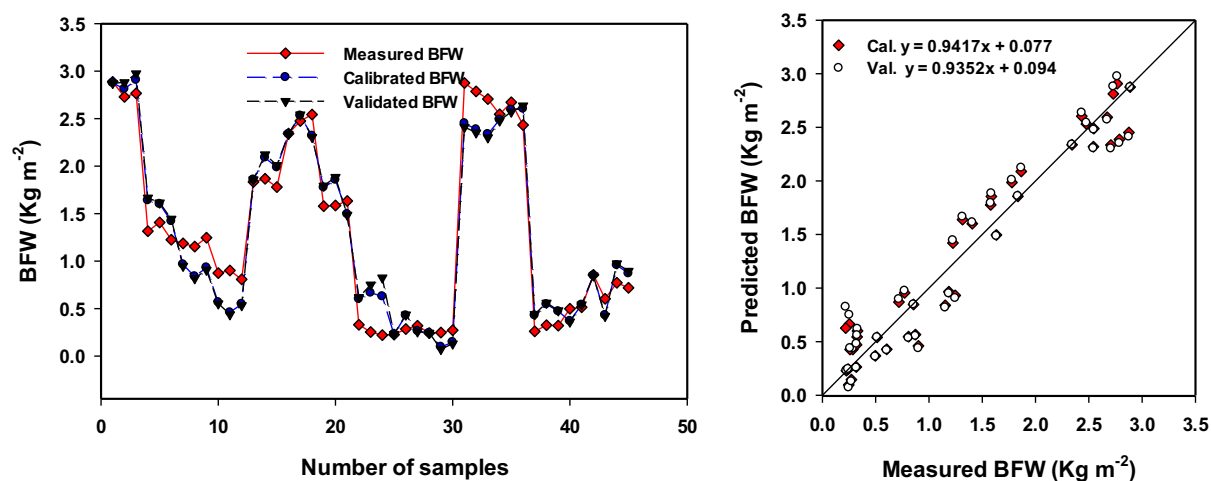

**Figure S2.** Comparison between measuring series, calibrating series and validating series for biomass fresh weight (BFW) of maize using the MLR models based on selected vegetation-SRIs extracted from (a) radiometric ground-based data, (b) extracted from QuickBird satellite imagery and (c) extracted from both methods.

(a) Radiometric ground-based data

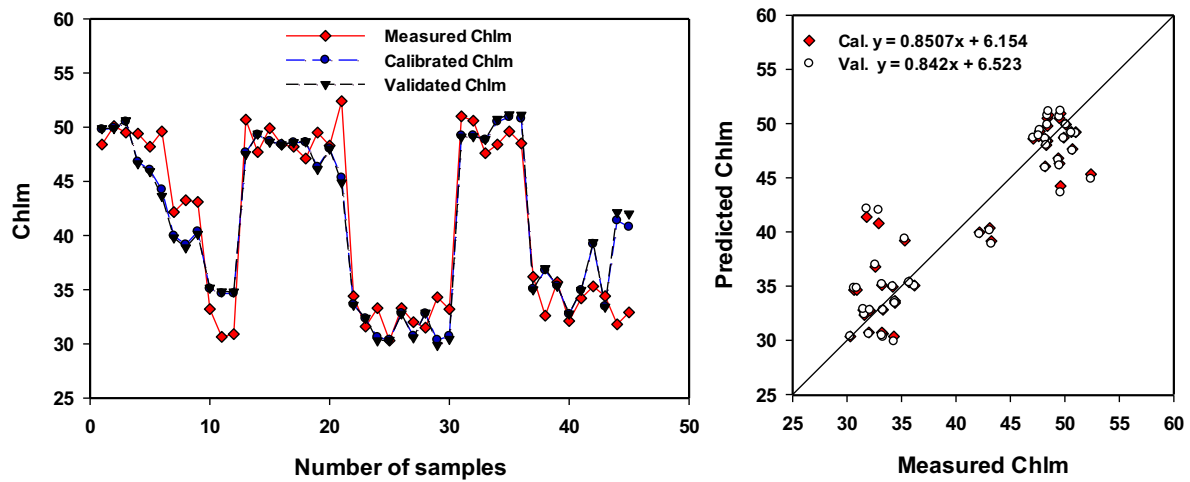

(b) QuickBird satellite imagery

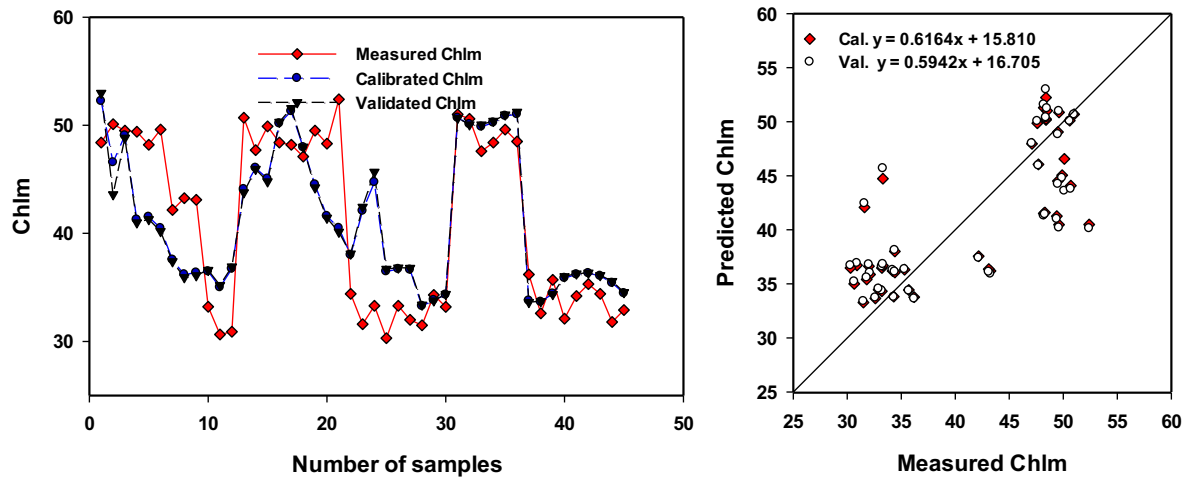

(c) Both Methods

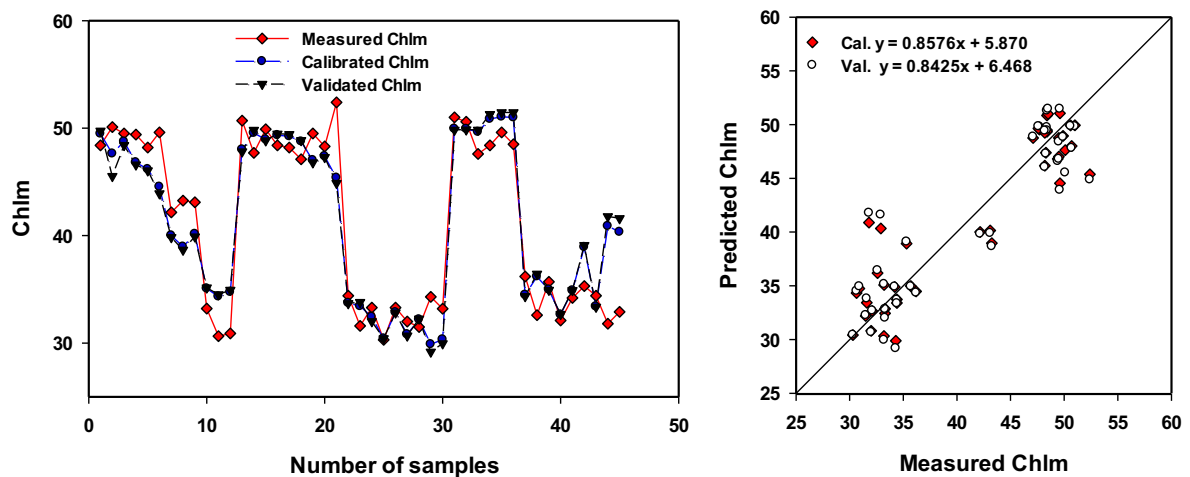

**Figure S3.** Comparison between measuring series, calibrating series and validating series for Chlorophyll meter (Chlm) of maize using the MLR models based on selected vegetation-SRIs extracted from (a) radiometric ground-based data, (b) extract from QuickBird satellite imagery and (c) extracted from both methods.
